# Supplementary material for: Zinc anilido-oxazolinate complexes as initiators for ring opening polymerization
Source: Royal Society of Chemistry journal article supplement (doi:10.1039/b705398c), 2007-01-01
Supplement: b705398c.pdf [file b705398c.pdf]

Supplementary Material (ESI) for Dalton Transactions  
This journal is (c) The Royal Society of Chemistry 2007  
Supporting Information

## **Zinc Anilido-Oxazolate Complexes as Initiators for Ring Opening**

### **Polymerization**

Chi-Tien Chen,\* Chi-Yu Chan, Chi-An Huang, Ming-Tsz Chen and Kuo-Fu Peng

*Department of Chemistry, National Chung Hsing University, Taichung 402, Taiwan*

E-mail: [ctchen@dragon.nchu.edu.tw](mailto:ctchen@dragon.nchu.edu.tw)

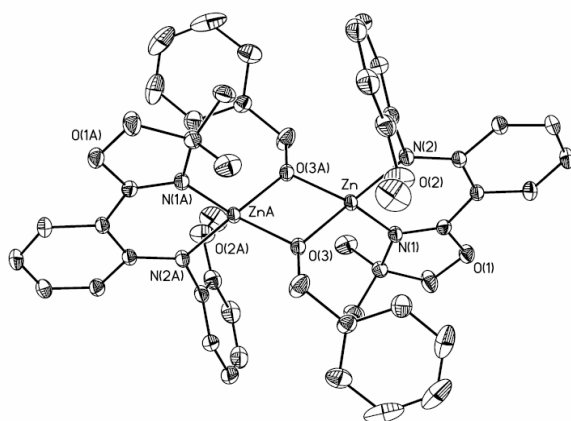

**Fig. S1** Molecular structure of **7**. Selected bond lengths (Å) and bond angles (°): Zn-N(2), 1.9447(17); Zn-O(3), 1.9588(14); Zn-O(3A), 1.9734(14); Zn-N(1), 1.9829(17); ZnA-O(3), 1.9734(14); N(1)-C(14), 1.286(3); N(2)-C(1), 1.366(3); N(2)-C(7), 1.426(3); O(3)-Zn-O(3A), 81.34(6); N(2)-Zn-N(1), 95.46(7); Zn-O(3)-ZnA, 98.66(6). Hydrogen atoms omitted for clarity. Perspective view of **7** with probability ellipsoids at 20% level. Symmetry code A= -x, -y, -z.

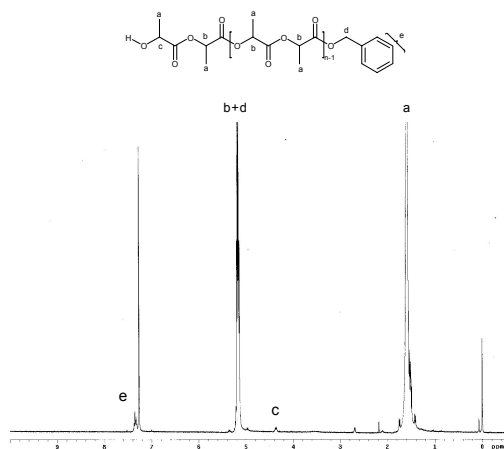

**Fig. S2**  $^1\text{H}$  NMR spectrum of PLA-50 initiated by **6** in toluene.

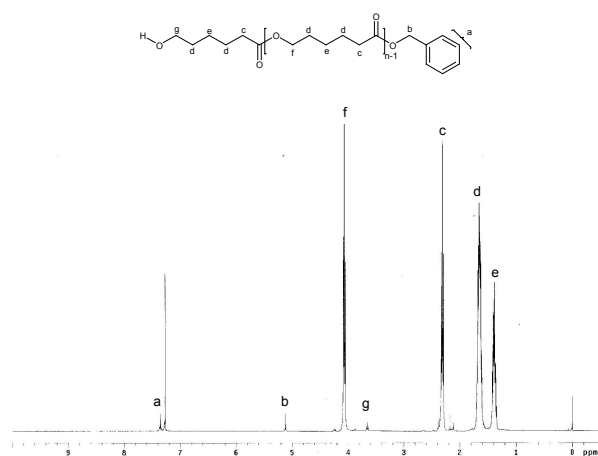

**Fig. S3** <sup>1</sup>H NMR spectrum of PCL-50 initiated by **6** in toluene.
